# Supplementary material for: A new pipeline SPICE identifies novel JUN-IKZF1 composite elements
Source: eLife journal article supplement (doi:10.7554/elife.88833), 2023-08-25
Supplement: supp1 [file elife-88833-supp1-v1.pdf]

**Table 1**

| <b>STATs<br/>(Conditions)</b> | <b>Identified canonical GAS motif</b>                                             | <b>GAS%</b> | <b>Tetramer<br/>likelihood</b> | <b>Optimal<br/>Spacing<br/>(bp)</b> |
|-------------------------------|-----------------------------------------------------------------------------------|-------------|--------------------------------|-------------------------------------|
| STAT1<br>(MΦ, +IFN-γ)         | 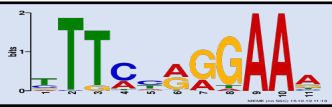 | 87.4%       | ****                           | 10                                  |
| STAT2<br>(Th1, +IFN-γ)        |  | 38.2%       | NA                             | NA                                  |
| STAT3<br>(CD8T, +IL-21)       |  | 87.0%       | ***                            | 11?                                 |
| STAT4<br>(Th1)                |  | 95.4%       | ****                           | 11-12                               |
| STAT5A<br>(Total T, +IL-2)    |  | 99.8%       | ****                           | 6-7, 11-12                          |
| STAT5B<br>(Total T, +IL-2)    |  | 100%        | ****                           | 6-7,11-12                           |
